# Supplementary material for: Multifunctional Carbonized Nanogels to Treat Lethal Acute Hepatopancreatic Necrosis Disease
Source: Research Square preprint supplement (doi:10.21203/rs.3.rs-942245/v1), 2021-10-01

**Graphical abstract**

Mild pyrolysis of polysaccharide dextran and 1,8-diaminooctane formcarbonized nanogels (CNGs) through controlled cross-linking and carbonization. The CNGs exhibit strong bactericidal activity, even in saline solution, by disruption of bacterial membranes, toxin absorption, and bacterial decolonization in the intestinal tract for AHPND therapy caused by *Vibrio* infections.


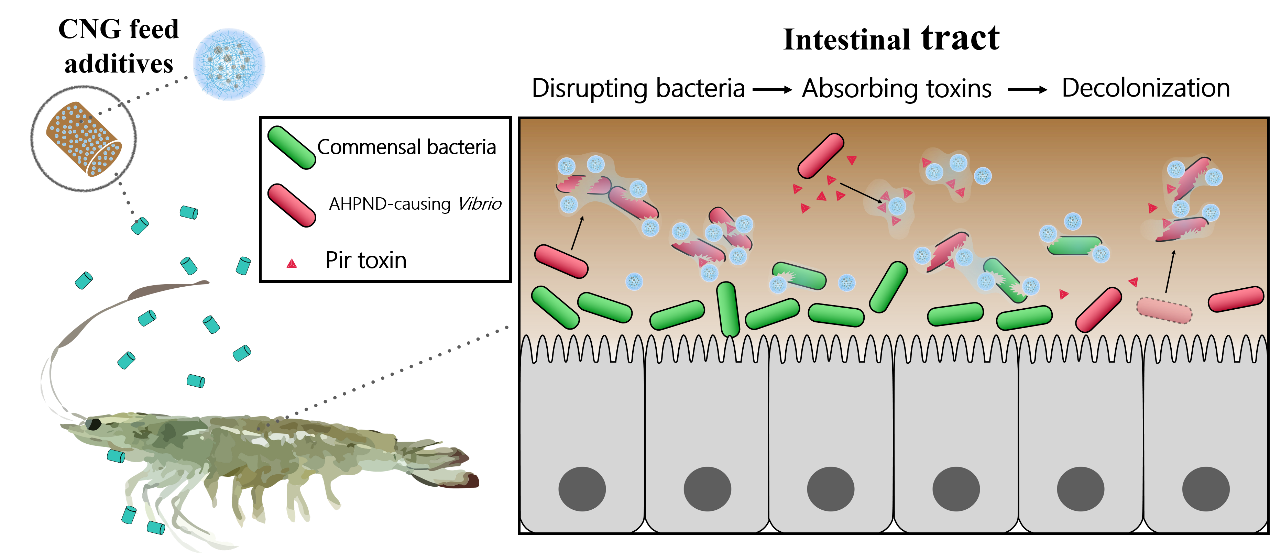

Supplement: Supplementary file 1 [file 048c4a875e3485f97fc69894.docx]
